# Supplementary material
Source: PubMed Central journal article supplement (PMC4789900)
Supplement: lic-0005-0037-s01.pdf [file lic-0005-0037-s01.pdf]

**Patients with prior  
TACE  
n=209**

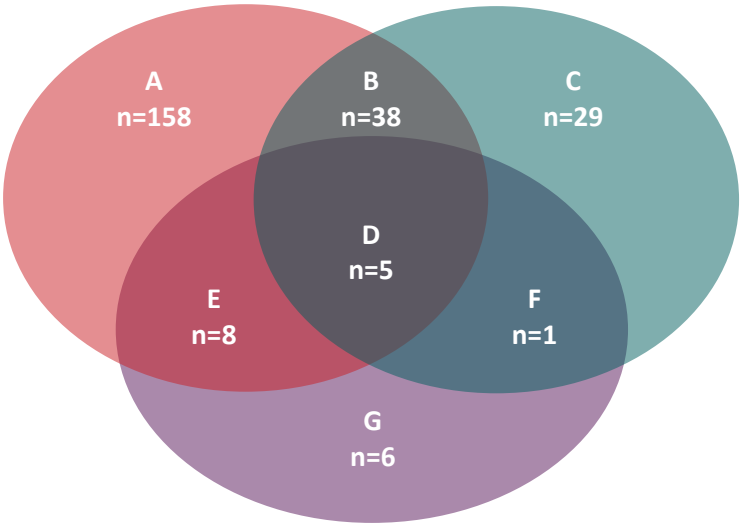

**Patients with  
concomitant TACE  
n=73**

**Patients with TACE  
after discontinuation  
n=20**
